1 **A novel method to model read counts in genomic data to reduce false posi-**  
2 **tive identification of heterozygotes**

3 Steven H. Wu,<sup>1</sup> Rachel S. Schwartz,<sup>1</sup> David J. Winter,<sup>1</sup> Don Conrad,<sup>3</sup> Reed A. Cartwright<sup>1, 2, \*</sup>

4 <sup>1</sup>The Biodesign Institute, <sup>2</sup>School of Life Sciences

5 Arizona State University

6 Tempe, AZ, USA

7 <sup>3</sup>Washington University in St. Louis

8 St. Louis, MO, USA

9 \*Corresponding author: [cartwright@asu.edu](mailto:cartwright@asu.edu)

10 Key words: next-generation sequencing, genotyping, genotype likelihood, mixture of Dirichlet multino-  
11 mial.

## 12 **Abstract**

13 Accurate identification of genotypes is critical in identifying *de novo* mutations, linking mutations with  
14 disease, and determining mutation rates. To call genotypes correctly from short-read data requires  
15 modeling read counts for each base. True heterozygotes may be affected by mapping reference bias and  
16 library preparation, leading to a distribution of reads that does not fit a 1:1 binomial distribution, and  
17 potentially resulting failure to call the alternate allele. Homozygous sites can be affected by the alignment  
18 of paralogous genes and sequencing error, which could incorrectly suggest heterozygosity.

19 Previous work has modeled increased variance and skewed allele ratios to some degree. Here, we were  
20 able to model reads for all data as a mixture of Dirichlet multinomial distributions. This model has a  
21 better fit to the data than previously used models. In most cases we observed two distributions: one  
22 corresponds to a large proportion of heterozygous sites with a low reference bias and close-to-binomial  
23 distribution, and the other to a small proportion of sites with a high bias and overdispersion. The sites  
24 with high reference bias have not been previously identified as SNPs in extensive human genome research;  
25 thus, we believe these sites are not heterozygous in our data for the individuals studied here, and are  
26 falsely identified as heterozygous sites. We propose that this approach to modeling the distribution of  
27 NGS data provides a better fit to the data, which should lead to improved genotyping. Furthermore, the  
28 mixture of distributions may be used to suggest true and false positive *de novo* mutations. This approach  
29 provides an expected distribution of reads that can be incorporated into a model to estimate *de novo*  
30 mutations using reads across a pedigree.

## 31 **Background**

32 Identifying genotypes from next-generation sequencing (NGS) data is an important component of modern  
33 genomic analysis. Accurate genotyping is key to identifying sequence polymorphisms, detecting *de novo*  
34 mutations, linking genetic variants with disease, and determining mutation rates (Awadalla *et al*, 2010;  
35 Sayed *et al*, 2009). However, accurately identifying *de novo* mutations is a particular challenge, as true  
36 mutations are rare compared to errors in sequencing and downstream analyses.

37 Estimating genotypes from NGS data can be computationally and statistically complicated. A typical  
38 NGS experiment generates millions of short read fragments, 100 to 650 bp in length, that are aligned  
39 to a reference genome if available. For this reason, variant calling software typically uses a binomial  
40 distribution to model base-counts (although see Ramu *et al*, 2013). However, there are at least three  
41 experimental processes that affect the ratio of the alleles. (1) During library preparation, variation in  
42 amplification rates can cause some chromosomes to be replicated more than others (Heinrich *et al*, 2012).  
43 This variation is especially a concern if there is little starting material. (2) NGS technologies introduce  
44 sequencing errors into sequencing reads. Error-rates are on the order of 0.1–1% per base-call. While this  
45 may seem small, 0.1% error is equivalent to sequencing the wrong human genome, and 1% is equivalent to  
46 sequencing a chimpanzee instead of a human (Fox *et al*, 2014; Wall *et al*, 2014). (3) Bioinformatic methods  
47 that assemble reads with respect to a reference can misplace reads and penalize non-reference alleles  
48 (Degner *et al*, 2009). Together these processes shift the mean and increase the variance of sequencing-read  
49 distributions. Thus, it is possible for both homozygotes and heterozygotes to have an intermediate ratio  
50 of two alleles, making identification of true heterozygotes particularly difficult (Malhis and Jones, 2010).

51 These processes do not affect all parts of the genome equally. The genomic context of a site, including  
52 the presence of nearby indels, structural variants, or low-complexity regions, influences the probability  
53 that reads generated from a given site will be subject to these processes (Malhis and Jones, 2010). The  
54 mismatch between observed and expected read distributions created by the processes described above  
55 contributes to observed false positive single nucleotide polymorphism (SNP) discovery rates of 3 to  
56 12% (Harismendy *et al*, 2009). Because putative SNPs are typically validated using another sequencing  
57 technology, high false positive rates increase the effort required for validation.

## 58 **Previous approaches for accurate genotyping**

59 Modeling systematic bias and variation in data has provided some improvements in statistical discrimina-  
60 tion of true and false positive heterozygotes. The increased variance and skewed allele ratios produced  
61 from mismapped reads can be partially controlled for by including mapping quality data in a genotype-  
62 calling procedure. In the simplest approaches, reads with low quality scores are removed from an analysis.  
63 In Bayesian approaches to genotype calling, read quality data is included when calculating genotype prob-  
64 abilities (Li *et al*, 2009b). The increased variance caused by library preparation, sequencing, and errors in  
65 mapping reads to a reference genome can be accommodated by modeling read-counts as coming from a  
66 beta-binomial distribution (Ramu *et al*, 2013). The beta-binomial distribution acts as an over-dispersed  
67 binomial, allowing the excess variance to be handled in a standard statistical framework. All genotype  
68 calling procedures can be combined with machine learning algorithms that attempt to differentiate between  
69 true variants and those caused by sequencing artifacts (DePristo *et al*, 2011). However, maximizing the true  
70 positive rate (i.e. maintaining high sensitivity) while minimizing the false negative rate (i.e. maintaining  
71 high specificity), remains a significant challenge (Greiner *et al*, 2000).

## 72 **Our approach**

73 In this study we introduce a new model for the distribution of reads produced from NGS, in which reads  
74 are assumed to come from a mixture of Dirichlet multinomial distributions. The Dirichlet multinomial  
75 distribution (DM) is the general case of the beta-binomial, allowing for overdispersion and modeling  
76 of more than two outcomes. By fitting a mixture of DMs (MDM) we improve the beta-binomial models  
77 discussed above in two ways. First, we account for the context-dependent nature of genotyping errors by  
78 estimating multiple different DM models for a given dataset, each with different parameter values and  
79 levels of overdispersion. Second, we can explicitly model the presence of bases that are neither reference  
80 nor the likely alternative allele at a given site. This model allows us to directly estimate the probability of  
81 sequencing errors in a given DM model.

82 We first demonstrate the value of our approach by fitting MDMs to sequencing data derived from a haploid  
83 human cell line. The MDM produces a superior fit to this data compared to other methods, showing

84 that even relatively simple genetic datasets can be the result of heterogeneous processes, and thus  
85 benefit from a mixed-model approach. We then fit MDMs to diploid data generated by the 1000 Genomes  
86 Project (1000 Genomes Project Consortium *et al*, 2010, 2015). For this data, the MDM also improves the fits  
87 compared to other models. One component of the MDM model contains most of the true heterozygotes,  
88 while the other component contains primarily sites that have not been identified as heterozygous in  
89 any previous human research. Therefore we believe this model may be utilized to detect false positive  
90 heterozygous sites, leading to a significant reduction in the number of sites requiring validation.

## 91 **Results**

### 92 **Haploid Dataset**

93 We examined two genomic regions from the CHM1 (haploid human cell line) dataset: all of chromosome  
94 21 and part of chromosome 10. For each region we further split sites into two subsets. The full dataset  
95 (FD), where reads were only filtered to exclude regions with unusually high coverage, and the reference  
96 dataset (RD), where only sites with at least 80% of reads matching the reference base were included.

### 97 **Best fit models for haploid data**

98 We fit seven models to each genomic region in each dataset: a multinomial, a DM, and MDM models with  
99 two to six components. The addition of model components increased the likelihood of the model for  
100 all cases (Table 1). Using Bayesian information criterion (BIC), the best fitting model for each dataset  
101 was the two component MDM. In all cases a single component contains a substantial majority of sites  
102 (approximately 75% of sites for the reference dataset from chromosome 21 and 95% of the sites for other  
103 datasets). We will refer the component to which the highest proportion of sites is assigned as the “major  
104 component” and all other components as “minor components”.

105 The overdispersion parameter,  $\varphi$ , describes the degree which the expected variance of a given DM dis-  
106 tribution is greater than that of a corresponding multinomial.  $\varphi$  can take values between 0 and 1, with

107 0 being identical to the multinomial and 1 being completely overdispersed. For the full dataset, the  
108 major component had relative little overdispersion ( $\varphi = 0.00252$  and  $0.00415$  for chromosome 21 and  
109 chromosome 10 respectively). The minor component displayed strong overdispersion ( $\varphi = 0.892$  and  
110  $0.948$ ). For the reference dataset, there was also little overdispersion for the major component ( $\varphi = 0$  for  
111 chromosome 21 and  $0.00269$  for chromosome 10). After removing sites with high proportions of reads in  
112 the error categories, the minor component was slightly overdispersed ( $\varphi = 0.0153$  and  $0.0475$ ) (Table 1  
113 and supplementary tables)

#### 114 **Visualizing model fitting for the haploid data**

115 We examined the fit of the data to each model using quantile-quantile (QQ) plots, where the quantile of  
116 the observed read counts are plotted against the quantile of the estimated read counts. For the model  
117 with two components applied to the reference dataset, the reference and error counts fit the expected  
118 values (Figure 1 and supplementary figures).

#### 119 **Diploid dataset**

120 We examined the same two genomic regions for NA12878, the daughter of the CEU trio. In order to  
121 investigate the impact of sequencing technology on parameter estimates from our our model we repeated  
122 our analysis for each of the four released datasets (1000 Genomes Project Consortium *et al*, 2010, 2015) .  
123 As potential heterozygotes present the greatest challenge to variant calling, we focused on these sites.  
124 Specifically, we identified potential heterozygous sites using the SAMtools heterozygote caller on NA12878  
125 alone and using the trio caller. Sites were only included in the potential heterozygote (PH) dataset if they  
126 were called by both methods. We filtered the PH dataset to include only sites identified as SNPs by the  
127 1000 Genomes Project. We considered these sites to be true heterozygous sites (TH dataset). The number  
128 of sites and the proportion of true heterozygous sites are summarized in Table 2.

## 129 **Best fitting models**

130 We fit eight models to each of the 16 CEU datasets (two genomic regions, four release years, PH/TH): a  
131 multinomial, multinomial with reference bias, a DM, and MDMs with two to six components. The addition  
132 of model components increased the likelihood of the model for all cases (Table 3).

133 For the TH dataset, the best-fitting model as selected by BIC had two or three components, and the best  
134 AIC had three or four components depending on the run year. The majority of the sites (88–99%) were  
135 assigned to one component in the model (Table 3 and supplementary tables). The major component of the  
136 model for each dataset (the component with the highest proportion of sites) had little overdispersion ( $\varphi =$   
137 0 to 0.00055). In addition, the major component also had a approximately equal proportion of reference  
138 and alternative alleles (49% to 51%), and a relatively small error term ( $< 0.1\%$ ) for the 2011, 2012, and 2013  
139 datasets. Thus, the majority of sites fall into a component that is approximately a binomial distribution.  
140 The 2010 dataset has a slightly larger error term (0.2% and 0.3%), and the reference and alternate terms  
141 are 53% and 46% respectively. For the datasets with a two component model, the minor component is  
142 similar to the major component but with greater overdispersion ( $\varphi = 0.06 - 0.1$ ). For models with three  
143 components, the minor components had an elevated proportion of one of the reference, alternate, or  
144 error terms, and greater overdispersion. For instance, CEU2013 chromosome 21 has  $\varphi = 0.0656$  and  $\pi_{error}$   
145  $= 0.278$  for the third component.

146 For the PH dataset, the best fitting model had three to six components (Table 3). The major component  
147 of the model contains between 71% and 95% of sites for all years. As with the TH dataset, the major  
148 components all had little overdispersion ( $\varphi = 0$  to 0.00135). Even when models with greater than four  
149 components were favored by BIC, the additional components contain a very small proportion of the data  
150 ( $< 1\%$ ), and frequently produce estimates of sequencing error very close to zero. Thus, a model with  
151 more than three components is likely overfitting the data.

## 152 **Visualizing model fit**

153 We examined the fit of the data to each model using quantile-quantile (QQ) plots. When we examined the  
154 QQ plot for the MDM model with the lowest BIC, all three terms (reference allele, alternative allele, and

155 error term) fit closely to the expected values (Figure 2).

## 156 **Assignment of sites to model components**

157 We assigned each site from each of the eight PH datasets to a component in the MDM model based on the  
158 site likelihood. The minor or combined minor components were always enriched for false positive het-  
159 erozygous sites; these false positive sites made up between 10% and 51% of the sites in these components.  
160 The major component contained only 3 – 10 % of the false positives (Table 3 and supplementary table).

161 We constructed a receiver operating characteristic (ROC) curve to examine the performance of the MDM  
162 model as a classifier of heterozygotes (Figure 3 and supplementary figures). The performance of this  
163 classifier on a given dataset can be summarized by the area under the ROC curve (AUC). AUC was between  
164 0.634 and 0.81 (Table 4).

165 Based on the ROC curve, we selected a threshold value, the probability cutoff for assigning a site to the  
166 major component, with sensitivity close to 1 and specificity near 50%. Thus, we can use our model to filter  
167 out half of the false positive heterozygous sites without losing true heterozygotes.

## 168 **Classification of sites as copy number variants**

169 We tested the hypothesis that CNVs produce false positive heterozygous sites (Li, 2014). The proportion of  
170 the false positive heterozygous sites belonging to CNV regions is between 8% to 13% for chromosome 21,  
171 but < 2% for chromosome 10 (Table 5).

## 172 **Discussion**

173 We have developed a novel statistical approach to model the distribution of NGS reads. Using an MDM  
174 produces a better fit to haploid human cell line data than previous approaches (i.e. the multinomial  
175 and DM Ramu *et al*, 2013). This result demonstrates that NGS datasets from relatively simple biological



176 samples (i.e. no true heterozygotes and a high quality reference genome) can benefit from the approach  
177 we describe here.

178 Similarly, our MDM model provide a better fit to more complex data, including potentially heterozygous  
179 sites in data arising from the 1000 Genomes Project. Our goal in developing this model was to improve  
180 the accuracy of genotype calling, and reduce the number of false-positive variant calls produced from  
181 NGS data.

## 182 **Best fitting models**

183 Minor components of our MDMs tended to display bias toward reference or alternative alleles or higher  
184 values for overdispersion of sequencing errors. These results suggest that most sites in an NGS experiment  
185 match the idealized expectation of a binomial distributed of base-counts. On the other hand, a substantial  
186 minority of sites appear to be generated by processes that differ from this expectation. Moreover, these  
187 minor components are greatly enriched for apparently false positive heterozygous sites.

188 Our results are similar to that of Muralidharan *et al* (2012), who observed a high proportion of SNPs with  
189 low error rates and a low proportion of SNPs with high error rates. This result was attributed to high  
190 alignment error in repetitive regions. We now provide a way of using this approach to distinguish these  
191 two types of sites.

## 192 **Assignment of sites to model components**

193 The MDM classifier shows promise in discriminating true and false positive heterozygotes, as illustrated  
194 by our ROC curves. The two exceptions, CEU2010 chromosome 10 and CEU2013 chromosome 10, may be  
195 due to an extremely low proportion of false positives in the dataset: with only 5% false positive sites, it is  
196 a challenging task for the classification algorithm to identify these sites (Table 6). Thus, the modeling  
197 approach described here can be used to remove sites that have been called as heterozygous but are likely  
198 to be false positive calls, by selecting a probability cutoff for assigning sites to the major component and  
199 filtering out sites belonging to the minor components. Removing such sites reduces the cost and time

200 required for validation.

### 201 **Copy number variants**

202 It is possible that there is a weak correlation between false positive heterozygous sites and copy number  
203 variations in chromosome 21. We expected this correlation to be stronger across all regions. This also  
204 suggested that there are several other multiple factors caused copy number variations. Species with  
205 greater numbers of duplicated regions than humans may have greater numbers of sites incorrectly  
206 identified as heterozygous, potentially affecting the identification of *de novo* mutations.

### 207 **Conclusion**

208 Our modeling approach is designed to accommodate the correlated and context-specific nature of errors  
209 introduced in generating NGS datasets. The datasets we analyzed were produced using a variety of  
210 different library preparations and sequencing technologies. These differences are partly reflected in  
211 the different parameter values we estimate from our model. In particular, the 2010 dataset appears to  
212 have a quite different profile than those from other years: the major component of this model has higher  
213 overdispersion and stronger reference-bias than that of any other dataset.

214 Previous work has suggested that there is reference bias in mapping, and overdispersion due to bio-  
215 logical factors (Meyer and Liu, 2014). We observed very little reference bias and overdispersion for true  
216 heterozygotes. However, false positive heterozygote calls fall into a distribution with reference bias and  
217 overdispersion. By using an MDM model we believe we are able to separate true heterozygotes from false  
218 positive calls, which can significantly reduce the time and expense of subsequent validation work. In the  
219 future this modeling approach will be incorporated into a pedigree-based approach for accurate genotype  
220 calling (Cartwright *et al*, 2012)

## 221 **Methods**

### 222 **Data**

223 We extracted datasets from two types of data. The first dataset is the haploid human sequence from a  
224 hydatidiform mole cell line (CHM1hTERT SRR1283824 from SRP017546). We refer to this dataset as the  
225 CHM1 dataset in this paper.

226 Second, we obtained sequences from the 1000 Genomes Project for three individuals, a woman (NA12878)  
227 and both of her parents (NA12891 and NA12892). Sequencing was repeated for these individuals in different  
228 years using different technologies (2010, 2011, 2012, 2013). The 2010 dataset was generated during pilot 2  
229 studies; the 2013 PCR free dataset was part of the phase 3 release; the 2011 and 2012 datasets were two  
230 non-official release datasets, aligned with a decoy genome that captures reads that failed to align to the  
231 standard reference genome (1000 Genomes Project Consortium *et al*, 2010, 2015).

232 We refer to this dataset as the CEU dataset. If the release year is appended, for example CEU2013, then we  
233 refer to the specific release in 2013. For each of these five datasets (CHM1 and each of the four releases  
234 of CEU), we analyzed two genomic regions, the whole chromosome 21 and a subregion of chromosome  
235 10, from positions 85534747 to 135534747, which is approximately the same size as chromosome 21 (48  
236 million base pairs).

237 For CHM1 we probabilistically called genotypes by first obtaining allele counts for each base at each site  
238 using the mpileup function in SAMTools v1.2 (Li *et al*, 2009a; Li, 2011) and the human reference genome  
239 (Genome Reference Consortium human genome build 37). We then used BCFTools v1.2 (Li *et al*, 2009a; Li,  
240 2011) to identify potential heterozygous sites. For each of these sites we calculated the frequency of the  
241 reference allele and the frequency of all non-reference alleles (error). We filtered this dataset based on  
242 the read depth for each site: we removed sites with read counts of less than 10 or greater than 150. Sites  
243 with high numbers of reads are likely in copy number variable genes that have aligned to a single region  
244 of the genome. Apparent heterozygotes are more likely to be due to paralogs rather than variation within  
245 a gene. The low read filter limits the data to calls with enough coverage to provide a reasonably accurate  
246 call and proportion of reads for each base. We refer this dataset as the full dataset (FD). Additionally, we

247 removed sites for which less than 20% of the reads contained the reference allele. We refer to this dataset  
248 as the reference dataset (RD).

249 For the CEU data, we obtained allele counts as above for all three individuals. We then called genotypes  
250 as above on NA12878 (the daughter of the trio) and by using the BCFtools trio caller with the data from all  
251 three individuals. We limited the dataset we used for subsequent analyses to sites that were found by  
252 both methods. Sites that were found only in triocaller, but not in the individual caller were likely identified  
253 by the pedigree with limited data for the daughter; thus, these low coverage sites were not included in  
254 subsequent analysis. We removed sites with read counts of less than 10 or greater than 150, as for CHM1.  
255 We call this the Potential Heterozygote (PH) dataset. For each of these sites we calculated the frequency of  
256 the reference allele, the frequency of the alternate allele, and the frequency of any other alleles (error). We  
257 compared the frequencies of each allele category (reference, alternate, error) for each possible genotype  
258 combination. Because we found no differences in frequencies for different genotypes, all subsequent  
259 analyses were only performed on the general reference-alternate-error dataset.

260 We created an additional dataset by removing sites from the PH dataset not found to be heterozygous by  
261 the 1000 Genomes Project (1000 Genomes Project Consortium *et al*, 2010, 2015). We then discarded sites  
262 for which the alternate allele differed from the one previously identified by the 1000 Genomes Project. We  
263 call this the True Heterozygote dataset (TH). These datasets allow us to build a model that distinguishes  
264 sites found in the PH dataset but not in the TH dataset, which are likely false positive heterozygote calls.

265 Because the CHM1 dataset was larger than the CEU dataset, we randomly subsampled the CHM1 dataset  
266 to have an approximately equal number of sites (40,000 sites) as the CEU dataset.

## 267 **Model fitting and parameter estimation**

268 We fit seven models to each CHM1 dataset, and eight to each CEU dataset. The models included a  
269 multinomial, a multinomial with reference bias (CEU only), Dirichlet multinomial (DM) and mixtures of  
270 DM (MDM) distributions with various number of components, ranging from two to six. We estimated the  
271 parameters and calculated the genotype likelihood for each model.

272 The genotype likelihood measures the likelihood of a sample's genotype,  $G$ , given a set of base-calls,  
 273  $R$ , and is proportional to the probability of observing  $R$  if the genotype was  $G$ , i.e.  $L(G|R) \propto P(R|G)$ .  
 274 We derived genotype likelihoods using MDM distributions. The Dirichlet multinomial distribution is a  
 275 compound distribution generated when a Dirichlet distribution is used a prior for the probabilities of  
 276 success of a multinomial distribution:  $\mathbf{p} \sim \text{Dirichlet}(\boldsymbol{\alpha})$  and  $\mathbf{x} \sim \text{Multinomial}(N, \mathbf{p})$  where  $\boldsymbol{\alpha}$  is a  
 277 vector of concentration parameters,  $\mathbf{p}$  is a vector of proportions,  $\mathbf{x}$  is a vector of counts, and  $N$  is the  
 278 sample size. After integrating out  $\mathbf{p}$ , the resulting probability mass function can be trivially expressed as a  
 279 product of ratios of gamma functions:

$$P(\mathbf{x}; \boldsymbol{\alpha}, N) = \binom{N}{\mathbf{x}} \frac{\Gamma(\sum \alpha_i)}{\Gamma(\sum \alpha_i + N)} \prod_i \frac{\Gamma(\alpha_i + x_i)}{\Gamma(\alpha_i)} \quad (1)$$

280 where  $\sum x_i = N$  and  $\alpha_i > 0$ . Furthermore,

$$E(x_i) = N\pi_i \text{ and } \text{Var}(x_i) = N\pi_i(1 - \pi_i) \frac{A + N}{A + 1} \quad (2)$$

281 where  $A = \sum \alpha_i$  and  $\pi_i = \frac{\alpha_i}{A}$

282 It is helpful to reparameterize the distribution by letting  $\alpha_i = \frac{1-\varphi}{\varphi} \pi_i$ , where  $\varphi = \frac{1}{(A+1)}$  represents the  
 283 pairwise correlation between samples. As a result,  $\text{Var}(x_i) = N\pi_i(1 - \pi_i)(1 + (N - 1)\varphi)$  and  $\varphi \in [0, 1]$   
 284 is a parameter controlling the amount of excess variation in the Dirichlet multinomial. When  $\varphi = 0$ , the  
 285 DM reduces to a multinomial. Thus the Dirichlet multinomial can be interpreted as an over-dispersed  
 286 multinomial distribution: as  $\varphi$  approaches 1, the distribution is completely overdispersed, the dataset is  
 287 more heterogeneous than expected.

288 For a single-component Dirichlet multinomial, we computed the maximum likelihood estimate model  
 289 starting with a method-of-moments estimation and optimizing using the Newton-Raphson method. For  
 290 all other MDM, the maximum likelihood estimated was computed using an EM algorithm. This procedure  
 291 was repeated 1000 times to search for the global maximum likelihood estimation. For each repetition,  
 292 we started the search with the method of moments estimates of the parameters, then calculated the  
 293 likelihood of the data for each component.

294 For the Dirichlet multinomial distribution, we estimated  $\varphi$  as a measure of the overdispersion of the data.  
295 In addition, we estimated  $\rho$ , the proportion of sites belongs to each Dirichlet multinomial component. For  
296 the CHM1 dataset we estimated the proportion of the reference allele and error term for each model or  
297 model component. For each CEU dataset we estimated the proportion of the reference allele, alternate  
298 allele, and the error term.

299 To determine the optimal number of components in the MDM model both the Akaike information criterion  
300 (AIC) and Bayesian information criterion (BIC) were calculated for each dataset; the model with the lowest  
301 AIC or BIC is considered as the best model. We discussed about the model with the best BIC in the result  
302 section. The AIC and BIC for each model are calculated by the following formula;

$$AIC = -2\log(L) + 2\log(n) \quad (3)$$

303

$$BIC = -2\log(L) + k\log(n) \quad (4)$$

304 Where  $L$  is the maximum likelihood estimation from the model,  $k$  is the number of free parameters,  $n$  is  
305 the number of individual in the dataset.

### 306 **Visualizing model fit**

307 We visualized the fit of the data to each model and compared the fit between models using quantile-  
308 quantile (QQ) plots. The QQ plot plots the quantile of the observed read counts against the quantile  
309 of the estimated read counts. Parameters estimated from the EM were used to simulate the expected  
310 read counts for the plot. Two QQ plots, one for the reference allele and one for the error term, were  
311 used to illustrate the fit of models for the CHM1 dataset. Three separate QQ plots, one each for reference,  
312 alternate, and error terms, were used for the CEU datasets.

### 313 **Assignment of sites to model components**

314 To suggest the use of the MDM model as a classification method, we calculated the likelihood of every site  
315 under each component of the model in each of the CEU datasets. We assigned each site to a particular  
316 component in the MDM model by comparing the likelihood between all components. The likelihood for  
317 each component was reevaluated using the parameters estimated from the EM. The site was assigned to  
318 the component with the highest likelihood.

319 For the CEU PH dataset, we extracted all sites that assigned to the minor components. The number of  
320 true and false heterozygous sites and the proportion of false heterozygous sites were calculated using the  
321 1000 Genome Project.

322 To determine the performance of the classification algorithm, we implemented an alternative way to  
323 assign each site. We recalculated the density of the probabilities of assignment to the major component  
324 of the model, and we interpreted that as the probability of being true heterozygous site. We used these  
325 probabilities to construct the receiver operating characteristic (ROC) curve, where sensitivity is plotted  
326 against specificity, to examine the performance of our model as a classifier across a range of classification  
327 thresholds. The area under the ROC curve (AUC) summarizes the performance of this classification method  
328 across a range of cutoff points. An AUC of 1 represents a perfect classifier, while an AUC of 0.5 suggests the  
329 prediction is close to random.

### 330 **Classification of sites as copy number variants / paralogous**

331 One possible cause of identifying false positive heterozygous site is that the site belongs to the region  
332 which is known for copy number variation (CNV). We extracted all the known CNV sites for NA12878 in the  
333 CEU dataset from the 1000 Genomes Project. We extracted all known false positive heterozygous calls,  
334 which are sites in the PH dataset but not in the TH dataset, and mapped them to the known CNV sites. We  
335 calculated the proportion of sites belong to the known copy number variation sites for each dataset and  
336 each genomic regions.

## 337 **Figures**



Figure 1: QQ plots from CHM1 RD dataset show that mixture of Dirichlet multinomial models with two components fits better than multinomial and Dirichlet multinomial model.

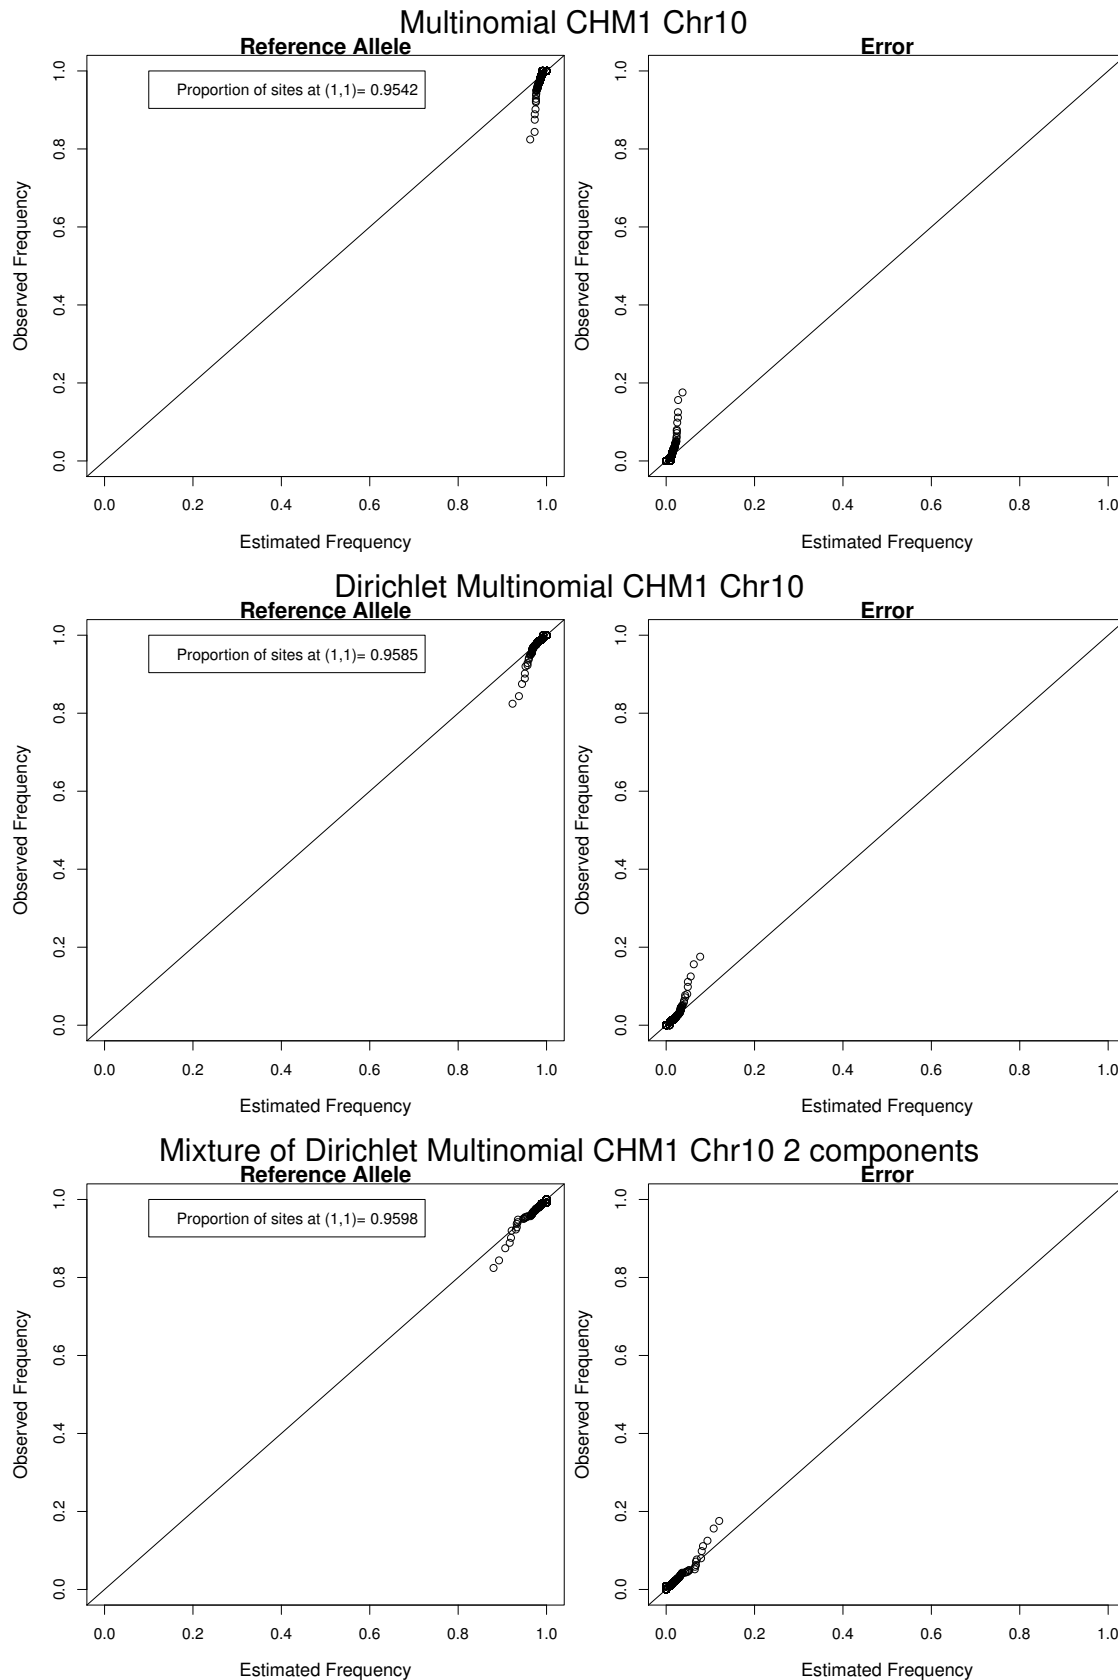

Figure 2: QQ plots for the CEU2013 TH dataset show that mixture of Dirichlet multinomial models with three components fits better than multinomial model.

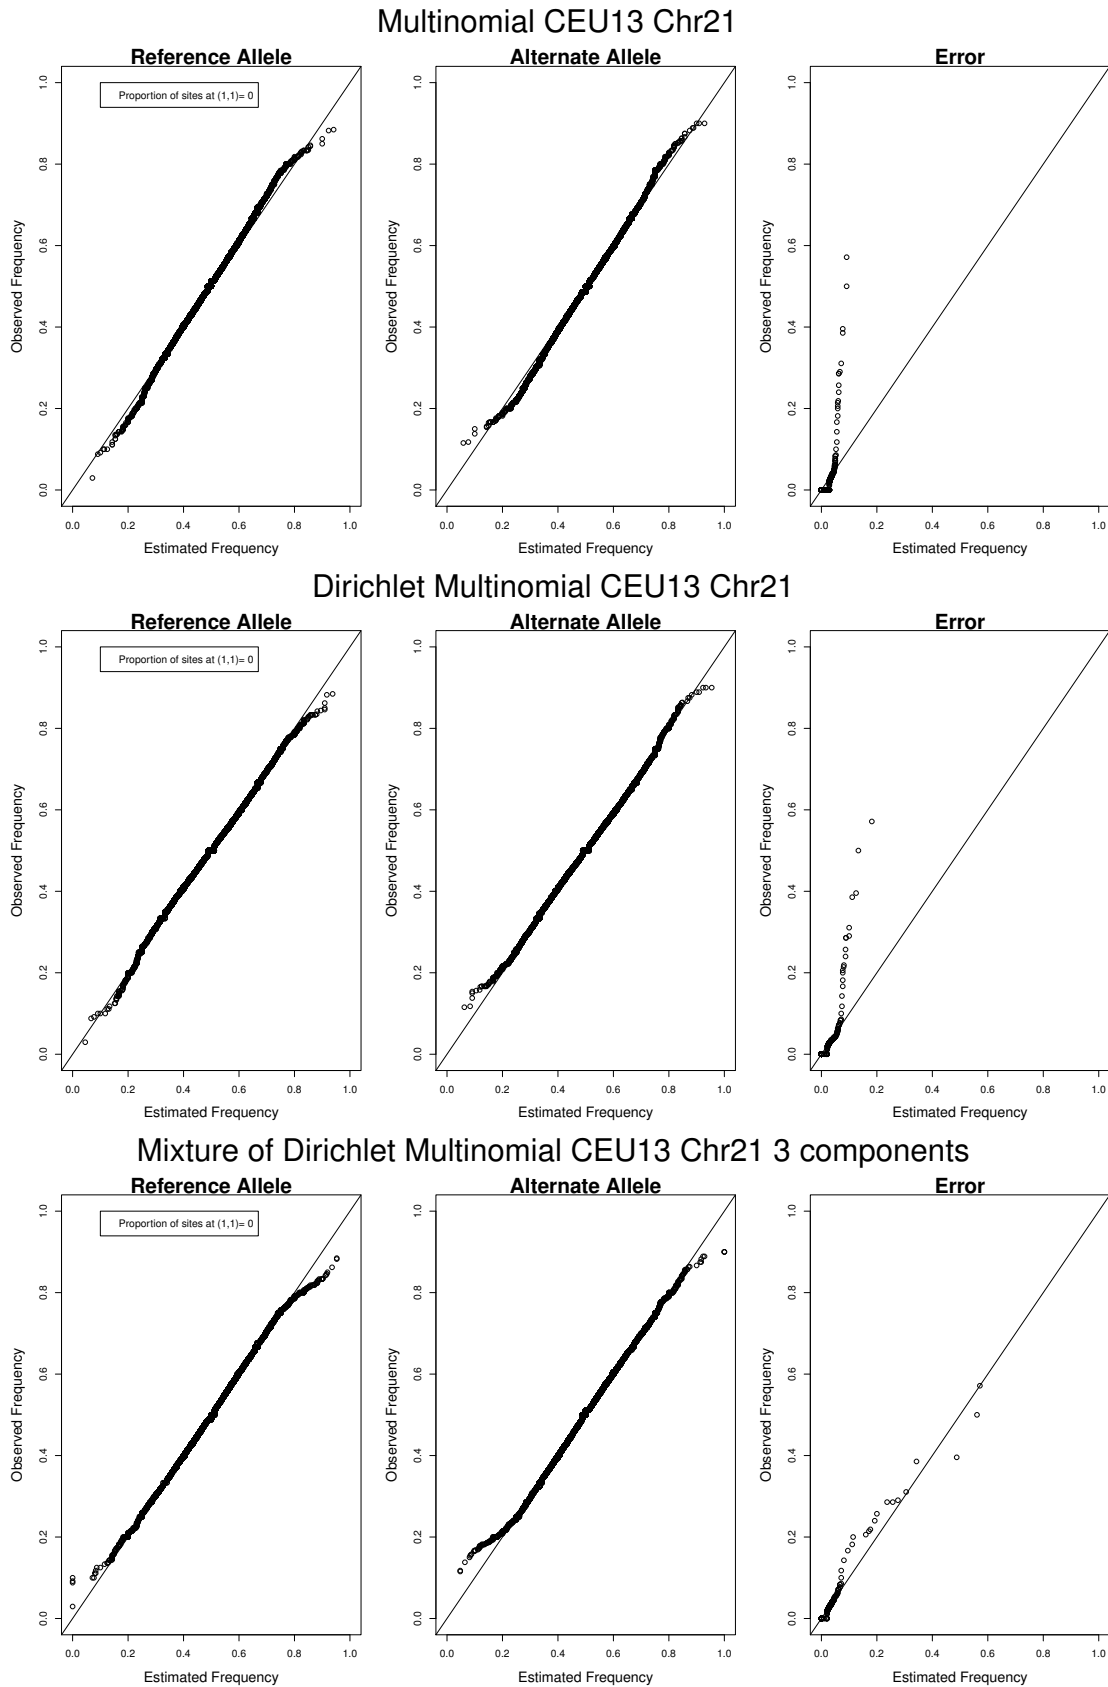

Figure 3: Receiver operating characteristic (ROC) curve with area under the curve for different components in the model.

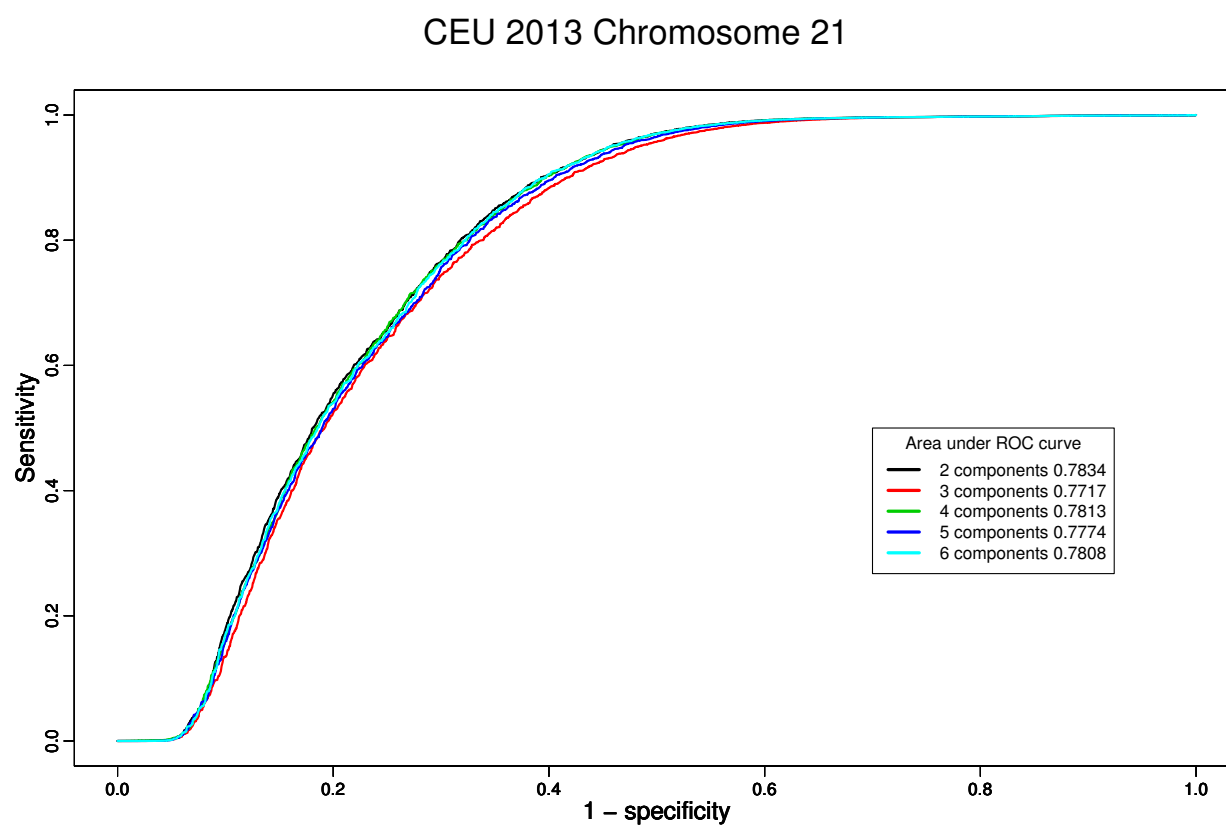

## 338 Tables

Table 1: The number of components in the best MDM model according to AIC and BIC values for each CHM1 dataset and parameters estimated for the best BIC model.  $\pi_{ref}$  is the proportion of the reference term.  $\pi_{err}$  is the proportion of the error term.  $\varphi$  is the overdispersion parameter. When  $\varphi = 0$ , the DM reduces to a multinomial. As  $\varphi$  approaches 1, the distribution is completely overdispersed.  $p$  is the proportion of site in each component. ML- $p$  is the proportion of sites assigned to each component using the likelihood.

| Dataset  | AIC | BIC | $\pi_{ref}$ | $\pi_{err}$ | $\varphi$ | $p$    | ML- $p$  |
|----------|-----|-----|-------------|-------------|-----------|--------|----------|
| Chr21 FD | 4   | 2   | 1           | 0.000249    | 0.00252   | 0.972  | 0.995    |
|          |     |     | 0.982       | 0.0176      | 0.892     | 0.0278 | 0.00485  |
| Chr21 RD | 2   | 2   | 1           | 0.00022     | 0         | 0.751  | 0.808    |
|          |     |     | 1           | 0.000361    | 0.0153    | 0.249  | 0.192    |
| Chr10 FD | 3   | 2   | 1           | 0.000282    | 0.00415   | 0.984  | 0.999    |
|          |     |     | 0.975       | 0.0254      | 0.948     | 0.0164 | 0.000978 |
| Chr10 RD | 2   | 2   | 1           | 0.00026     | 0.00269   | 0.942  | 0.997    |
|          |     |     | 0.999       | 0.000833    | 0.0475    | 0.0585 | 0.00324  |

Table 2: Number of heterozygous sites identified by different methods and the number of true heterozygous sites from 1000 Genomes Project.

| Dataset     | Individual caller only | Trio caller only | Both callers | True heterozygotes (TH) | Proportion of TH |
|-------------|------------------------|------------------|--------------|-------------------------|------------------|
| CEU13 Chr21 | 143                    | 1604             | 40956        | 30120                   | 0.735            |
| CEU13 Chr10 | 1652                   | 2645             | 38542        | 36590                   | 0.949            |
| CEU12 Chr21 | 151                    | 1171             | 38180        | 29983                   | 0.785            |
| CEU12 Chr10 | 106                    | 880              | 40144        | 36818                   | 0.917            |
| CEU11 Chr21 | 145                    | 1190             | 38107        | 29991                   | 0.787            |
| CEU11 Chr10 | 114                    | 867              | 40156        | 36825                   | 0.917            |
| CEU10 Chr21 | 6447                   | 4971             | 31773        | 28197                   | 0.887            |
| CEU10 Chr10 | 194                    | 1173             | 37108        | 35062                   | 0.945            |

Table 3: The number of components in the best MDM model according to AIC and BIC values for each CEU dataset and parameters estimated for the best BIC model.  $\pi_{ref}$  is the proportion of the reference term.  $\pi_{alt}$  is the proportion of the alternative term.  $\pi_{err}$  is the proportion of the error term.  $\varphi$  is the overdispersion parameter. When  $\varphi = 0$ , the DM reduces to a multinomial. As  $\varphi$  approaches 1, the distribution is completely overdispersed.  $p$  is the proportion of site in each component. ML- $p$  is the proportion of sites assigned to each component using the likelihood.

| Dataset        | AIC | BIC | $\pi_{ref}$ | $\pi_{alt}$ | $\pi_{err}$ | $\varphi$ | $p$      | ML- $p$ |
|----------------|-----|-----|-------------|-------------|-------------|-----------|----------|---------|
| CEU13 TH Chr21 | 4   | 3   | 0.504       | 0.496       | 0.000353    | 0.000246  | 0.939    | 0.783   |
|                |     |     | 0.508       | 0.491       | 0.000526    | 0.0689    | 0.0604   | 0.213   |
|                |     |     | 0.239       | 0.483       | 0.278       | 0.0656    | 0.000587 | 0.00412 |
| CEU13 TH Chr10 | 3   | 2   | 0.502       | 0.497       | 0.000336    | 0.000428  | 0.992    | 0.848   |
|                |     |     | 0.504       | 0.49        | 0.00621     | 0.124     | 0.00754  | 0.152   |
| CEU12 TH Chr21 | 4   | 2   | 0.509       | 0.491       | 0.000315    | 0.000129  | 0.961    | 0.84    |
|                |     |     | 0.541       | 0.457       | 0.00204     | 0.0773    | 0.039    | 0.16    |
| CEU12 TH Chr10 | 4   | 2   | 0.508       | 0.491       | 0.000319    | 0.000553  | 0.986    | 0.851   |
|                |     |     | 0.54        | 0.457       | 0.00305     | 0.076     | 0.0138   | 0.149   |
| CEU11 TH Chr21 | 4   | 2   | 0.509       | 0.491       | 0.000315    | 0.000131  | 0.961    | 0.842   |
|                |     |     | 0.541       | 0.457       | 0.00198     | 0.0782    | 0.0391   | 0.158   |
| CEU11 TH Chr10 | 3   | 2   | 0.508       | 0.491       | 0.000319    | 0.000556  | 0.986    | 0.848   |
|                |     |     | 0.542       | 0.455       | 0.00301     | 0.0737    | 0.0139   | 0.152   |
| CEU10 TH Chr21 | 3   | 2   | 0.533       | 0.465       | 0.00225     | 0.00152   | 0.922    | 0.718   |
|                |     |     | 0.67        | 0.327       | 0.0027      | 0         | 0.0783   | 0.282   |
| CEU10 TH Chr10 | 4   | 2   | 0.534       | 0.463       | 0.00305     | 0         | 0.684    | 0.606   |
|                |     |     | 0.55        | 0.449       | 0.000645    | 0.0129    | 0.316    | 0.394   |
| CEU13 PH Chr21 | 6   | 6   | 0.501       | 0.499       | 0.000336    | 8.44e-05  | 0.709    | 0.46    |
|                |     |     | 0.638       | 0.361       | 0.000751    | 0.00848   | 0.138    | 0.224   |
|                |     |     | 0.372       | 0.627       | 0.00066     | 0.00219   | 0.0681   | 0.194   |
|                |     |     | 0.781       | 0.219       | 0.000349    | 0         | 0.0662   | 0.0825  |
|                |     |     | 0.215       | 0.785       | 0.000288    | 0.00219   | 0.0129   | 0.0245  |
| CEU13 PH Chr10 | 3   | 3   | 0.502       | 0.497       | 0.000342    | 0         | 0.95     | 0.784   |
|                |     |     | 0.523       | 0.476       | 0.00147     | 0.0639    | 0.0492   | 0.205   |
|                |     |     | 0.299       | 0.485       | 0.216       | 0.0875    | 0.00121  | 0.011   |
|                |     |     | 0.507       | 0.492       | 0.000313    | 0         | 0.83     | 0.65    |
|                |     |     | 0.643       | 0.356       | 0.00117     | 0.0157    | 0.0997   | 0.169   |
| CEU12 PH Chr21 | 6   | 5   | 0.381       | 0.618       | 0.00127     | 0.037     | 0.0433   | 0.125   |
|                |     |     | 0.778       | 0.221       | 0.000457    | 0         | 0.024    | 0.0458  |
|                |     |     | 0.439       | 0.375       | 0.186       | 0.102     | 0.00302  | 0.0101  |
|                |     |     | 0.508       | 0.491       | 0.000329    | 0.000834  | 0.957    | 0.8     |
|                |     |     | 0.686       | 0.313       | 0.00144     | 0.0152    | 0.0371   | 0.13    |
| CEU12 PH Chr10 | 6   | 4   | 0.286       | 0.711       | 0.00207     | 0.0166    | 0.00317  | 0.0628  |
|                |     |     | 0.424       | 0.388       | 0.188       | 0.0748    | 0.00232  | 0.00735 |
|                |     |     | 0.507       | 0.492       | 0.000311    | 0         | 0.831    | 0.648   |
|                |     |     | 0.641       | 0.358       | 0.00113     | 0.0142    | 0.0979   | 0.17    |
| CEU11 PH Chr21 | 6   | 5   | 0.379       | 0.62        | 0.00125     | 0.0356    | 0.0428   | 0.125   |
|                |     |     | 0.776       | 0.223       | 0.000423    | 0         | 0.0251   | 0.0463  |
|                |     |     | 0.446       | 0.375       | 0.179       | 0.102     | 0.0031   | 0.0109  |
|                |     |     | 0.508       | 0.491       | 0.000331    | 0.000854  | 0.958    | 0.802   |
| CEU11 PH Chr10 | 6   | 4   | 0.687       | 0.312       | 0.00141     | 0.0141    | 0.0363   | 0.127   |
|                |     |     | 0.288       | 0.71        | 0.00207     | 0.0165    | 0.00309  | 0.063   |
|                |     |     | 0.427       | 0.387       | 0.186       | 0.0756    | 0.00233  | 0.00755 |
|                |     |     | 0.532       | 0.465       | 0.00221     | 0.00135   | 0.832    | 0.584   |
| CEU10 PH Chr21 | 6   | 4   | 0.696       | 0.301       | 0.00324     | 0.0089    | 0.145    | 0.247   |
|                |     |     | 0.343       | 0.653       | 0.00423     | 0.0249    | 0.0193   | 0.122   |
|                |     |     | 0.54        | 0.351       | 0.109       | 0.069     | 0.0038   | 0.0472  |
|                |     |     | 0.532       | 0.466       | 0.00227     | 0.000483  | 0.88     | 0.599   |
| CEU10 PH Chr10 | 5   | 3   | 0.66        | 0.338       | 0.00208     | 0.00326   | 0.0877   | 0.292   |
|                |     |     | 0.508       | 0.482       | 0.00987     | 0.0637    | 0.032    | 0.109   |

Table 4: Summary of the area under receiver operating characteristic curve for each CEU PH dataset.

| Dataset     | Area under ROC curve |
|-------------|----------------------|
| CEU13 Chr21 | 0.772                |
| CEU13 Chr10 | 0.634                |
| CEU12 Chr21 | 0.813                |
| CEU12 Chr10 | 0.792                |
| CEU11 Chr21 | 0.812                |
| CEU11 Chr10 | 0.791                |
| CEU10 Chr21 | 0.761                |
| CEU10 Chr10 | 0.691                |

Table 5: CNVs are a small fractions of FP. Summary of the number copy number variants (CNV) sites within the false positive heterozygous sites in each CEU dataset.

| Dataset     | Not CNV | CNV  | CNV proportion |
|-------------|---------|------|----------------|
| CEU13 Chr21 | 8038    | 1074 | 0.1179         |
| CEU13 Chr10 | 1710    | 31   | 0.01781        |
| CEU12 Chr21 | 4901    | 440  | 0.08238        |
| CEU12 Chr10 | 3023    | 32   | 0.01047        |
| CEU11 Chr21 | 4845    | 439  | 0.08308        |
| CEU11 Chr10 | 3020    | 32   | 0.01048        |
| CEU10 Chr21 | 2600    | 399  | 0.133          |
| CEU10 Chr10 | 1840    | 8    | 0.004329       |

Table 6: The major component has lower percentage of false positive and CNV. Proportion of true heterozygotes (TH) and false-positive heterozygote calls (FH) in each component for each CEU dataset. First category is the major component, all minor components are combined in the second category.

| Dataset     | FH   | TH    | FH proportion | Not CNV | CNV | CNV proportion |
|-------------|------|-------|---------------|---------|-----|----------------|
| CEU13 Chr21 | 3130 | 24209 | 0.1145        | 26924   | 415 | 0.01518        |
|             | 5982 | 5642  | 0.5146        | 10851   | 773 | 0.0665         |
| CEU13 Chr10 | 1167 | 30939 | 0.03635       | 32012   | 94  | 0.002928       |
|             | 574  | 5322  | 0.09735       | 5864    | 32  | 0.005427       |
| CEU12 Chr21 | 1778 | 25306 | 0.06565       | 26891   | 193 | 0.007126       |
|             | 3563 | 4528  | 0.4404        | 7760    | 331 | 0.04091        |
| CEU12 Chr10 | 1289 | 31361 | 0.03948       | 32560   | 90  | 0.002757       |
|             | 1766 | 5306  | 0.2497        | 7035    | 37  | 0.005232       |
| CEU11 Chr21 | 1765 | 25284 | 0.06525       | 26858   | 191 | 0.007061       |
|             | 3519 | 4557  | 0.4357        | 7743    | 333 | 0.04123        |
| CEU11 Chr10 | 1293 | 31335 | 0.03963       | 32539   | 89  | 0.002728       |
|             | 1759 | 5339  | 0.2478        | 7060    | 38  | 0.005354       |
| CEU10 Chr21 | 967  | 21110 | 0.0438        | 21968   | 109 | 0.004937       |
|             | 2032 | 6812  | 0.2298        | 8518    | 326 | 0.03686        |
| CEU10 Chr10 | 815  | 25614 | 0.03084       | 26380   | 49  | 0.001854       |
|             | 1033 | 9190  | 0.101         | 10197   | 26  | 0.002543       |

## 339 **Competing interests**

340 The authors declare that they have no competing interests.

## 341 **Acknowledgements**

342 This was supported by NIH Grants R01-GM101352 to RA Zufall, RBR Azevedo, and RA Cartwright and  
343 R01-HG007178 to DF Conrad and RA Cartwright.

## 344 **References**

- 345 1000 Genomes Project Consortium, G. R. Abecasis, D. Altshuler, A. Auton, L. D. Brooks, R. M. Durbin, R. A.  
346 Gibbs, M. E. Hurles, and G. A. McVean. 2010. A map of human genome variation from population-scale  
347 sequencing. *Nature* 467:1061–1073.
- 348 1000 Genomes Project Consortium, A. Auton, L. D. Brooks, R. M. Durbin, E. P. Garrison, H. M. Kang, J. O.  
349 Korb, J. L. Marchini, S. McCarthy, G. A. McVean, and G. R. Abecasis. 2015. A global reference for human  
350 genetic variation. *Nature* 526:68–74.
- 351 Awadalla, P., J. Gauthier, R. A. Myers, F. Casals, F. F. Hamdan, A. R. Griffing, M. Côté, E. Henrion, D. Spiegel-  
352 man, J. Tarabeux, A. Piton, Y. Yang, A. Boyko, C. Bustamante, L. Xiong, J. L. Rapoport, A. M. Addington,  
353 J. L. E. DeLisi, M.-O. Krebs, R. Joob, B. Millet, E. Fombonne, L. Mottron, M. Zilvermit, J. Kee-  
354 bler, H. Daoud, C. Marineau, M.-H. Roy-Gagnon, M.-P. Dubé, A. Eyre-Walker, P. Drapeau, E. A. Stone,  
355 R. G. Lafrenière, and G. A. Rouleau. 2010. Direct measure of the de novo mutation rate in autism and  
356 schizophrenia cohorts. *Am J Hum Genet* 87:316–324.
- 357 Cartwright, R. A., J. Hussin, J. E. M. Keebler, E. A. Stone, and P. Awadalla. 2012. A family-based probabilistic  
358 method for capturing de novo mutations from high-throughput short-read sequencing data. *Stat Appl*  
359 *Genet Mol Biol* 11.
- 360 Degner, J. F., J. C. Marioni, A. A. Pai, J. K. Pickrell, E. Nkadori, Y. Gilad, and J. K. Pritchard. 2009. Effect of

- 361 read-mapping biases on detecting allele-specific expression from RNA-sequencing data. *Bioinformatics*  
362 25:3207–3212.
- 363 DePristo, M. A., E. Banks, R. Poplin, K. V. Garimella, J. R. Maguire, C. Hartl, A. A. Philippakis, G. del Angel,  
364 M. A. Rivas, M. Hanna, and et al. 2011. A framework for variation discovery and genotyping using next-  
365 generation DNA sequencing data. *Nat Genet* 43:491–498.
- 366 Fox, E. J., K. S. Reid-Bayliss, M. J. Emond, and L. A. Loeb. 2014. Accuracy of Next Generation Sequencing  
367 Platforms. *Next Gener Seq Appl* 1.
- 368 Greiner, M., D. Pfeiffer, and R. D. Smith. 2000. Principles and practical application of the receiver-operating  
369 characteristic analysis for diagnostic tests. *Prev Vet Med* 45:23–41.
- 370 Harismendy, O., P. C. Ng, R. L. Strausberg, X. Wang, T. B. Stockwell, K. Y. Beeson, N. J. Schork, S. S. Murray,  
371 E. J. Topol, S. Levy, and K. A. Frazer. 2009. Evaluation of next generation sequencing platforms for  
372 population targeted sequencing studies. *Genome Biol* 10:R32.
- 373 Heinrich, V., J. Stange, T. Dickhaus, P. Imkeller, U. Krüger, S. Bauer, S. Mundlos, P. N. Robinson, J. Hecht,  
374 and P. M. Krawitz. 2012. The allele distribution in next-generation sequencing data sets is accurately  
375 described as the result of a stochastic branching process. *Nucleic Acids Res* 40:2426–2431.
- 376 Li, H. 2011. A statistical framework for SNP calling, mutation discovery, association mapping and popula-  
377 tion genetical parameter estimation from sequencing data. *Bioinformatics* 27:2987–2993.
- 378 Li, H. 2014. Toward better understanding of artifacts in variant calling from high-coverage samples. *Bioin-  
379 formatics* 30:2843–2851.
- 380 Li, H., B. Handsaker, A. Wysoker, T. Fennell, J. Ruan, N. Homer, G. Marth, G. Abecasis, R. Durbin, and . G. P.  
381 D. P. S. . 2009a. The Sequence Alignment/Map format and SAMtools. *Bioinformatics* 25:2078–2079.
- 382 Li, R., Y. Li, X. Fang, H. Yang, J. Wang, K. Kristiansen, and J. Wang. 2009b. SNP detection for massively  
383 parallel whole-genome resequencing. *Genome Res* 19:1124–1132.
- 384 Malhis, N., and S. J. M. Jones. 2010. High quality SNP calling using Illumina data at shallow coverage.  
385 *Bioinformatics* 26:1029–1035.



- 386 Meyer, C. A., and X. S. Liu. 2014. Identifying and mitigating bias in next-generation sequencing methods  
387 for chromatin biology. *Nat Rev Genet* 15:709–721.
- 388 Muralidharan, O., G. Natsoulis, J. Bell, D. Newburger, H. Xu, I. Kela, H. Ji, and N. Zhang. 2012. A cross-sample  
389 statistical model for SNP detection in short-read sequencing data. *Nucleic Acids Res* 40:e5.
- 390 Ramu, A., M. J. Noordam, R. S. Schwartz, A. Wuster, M. E. Hurles, R. A. Cartwright, and D. F. Conrad. 2013.  
391 DeNovoGear: de novo indel and point mutation discovery and phasing. *Nat Methods* 10:985–987.
- 392 Sayed, S., D. R. Langdon, S. Odili, P. Chen, C. Buettger, A. B. Schiffman, M. Suchi, R. Taub, J. Grimsby, F. M.  
393 Matschinsky, and C. A. Stanley. 2009. Extremes of clinical and enzymatic phenotypes in children with  
394 hyperinsulinism caused by glucokinase activating mutations. *Diabetes* 58:1419–1427.
- 395 Wall, J. D., L. F. Tang, B. Zerbe, M. N. Kvale, P.-Y. Kwok, C. Schaefer, and N. Risch. 2014. Estimating genotype  
396 error rates from high-coverage next-generation sequence data. *Genome Res* 24:1734–1739.
